# Supplementary material for: Rixosomal RNA degradation contributes to silencing of Polycomb target genes
Source: PubMed Central journal article supplement (PMC8986528; doi:10.1038/s41586-022-04598-0), 2022-03-30

**Supplementary information**

---

**Rixosomal RNA degradation contributes to silencing of Polycomb target genes**

---

In the format provided by the authors and unedited

**Supplementary information**

---

**Rixosomal RNA degradation contributes to silencing of Polycomb target genes**

---

In the format provided by the authors and unedited

**Supplementary Tables 1-6 and Supplementary Figure 1**

**Rixosomal RNA degradation contributes to silencing of Polycomb target genes**

Haining Zhou<sup>1</sup>, Chad B. Stein<sup>2</sup>, Tiasha A. Shafiq<sup>1</sup>, Gergana Shipkovenska<sup>1</sup>, Marian Kalocsay<sup>3</sup>, Joao A. Paulo<sup>3</sup>, Jiuchun Zhang<sup>4</sup>, Zhenhua Luo<sup>5</sup>, Steven P. Gygi<sup>3</sup>, Karen Adelman<sup>2</sup>, Danesh Moazed<sup>1\*</sup>

<sup>1</sup>Howard Hughes Medical Institute, Department of Cell Biology, Harvard Medical School, Boston, MA, USA.

<sup>2</sup>Department of Biological Chemistry and Molecular Pharmacology, Blavatnik Institute, Harvard Medical School, Boston, MA, USA.

<sup>3</sup>Department of Cell Biology, Harvard Medical School, Boston, MA, USA.

<sup>4</sup>Initiative for Genome Editing and Neurodegeneration, Department of Cell Biology, Blavatnik Institute, Harvard Medical School, Boston, MA, USA.

<sup>5</sup>Precision Medicine Institute, the First Affiliated Hospital, Sun Yat-sen University, Guangzhou, China

\*Correspondence: [danesh@hms.harvard.edu](mailto:danesh@hms.harvard.edu)

**Supplementary Table 1. List of siRNA sequences used in this study.**

| siRNA            | sequence                        | SOURCE                 |
|------------------|---------------------------------|------------------------|
| negative control | 5'-UUCUCCGAACGUGUCACGU-3'       | This study             |
| NOL9             | 5'-AGACCUAAGUUCUGUCGAA-3'       | This study             |
| SUV39H1          | 5'-UCUUGUGGCAAAGAAAGCGAUGCGG-3' | Reference <sup>1</sup> |
| WDR18            | 5'-AGAUCAAUCGGGACCUGUU-3'       | This study             |
| MDN1             | 5'-GGAAUGCCGAAGCCAUUA-3'        | Reference <sup>2</sup> |
| XRN2-1           | 5'-CCAGUAAACCUAAUCCAAA-3'       | This study             |
| XRN2-2           | 5'-GCAGAUGCUGAUCUCAUUA-3'       | This study             |
| SENP3            | 5'-GGGAGUCCCUUCCCAAGAA-3'       | This study             |
| LAS1L            | 5'-CAUUUAUACCCAGAGUGGA-3'       | This study             |
| TEX10            | 5'-GCAGUUCAACUUCUCAAU-3'        | This study             |
| EZH2-1           | 5'-GCUCUAGACAACAAACCUU-3'       | This study             |
| EZH2-2           | 5'-GCUCUAGACAACAAACCUU-3'       | This study             |
| PELP1            | 5'-GCACUGUGUGUCUUGGCUU-3'       | This study             |
| RING1A           | 5'-CCUGAUCUCUAAGAUCUAU-3'       | This study             |
| RING1B-1         | 5'-GCUCAUCAAGAGAGAGUAU-3'       | This study             |
| RING1B-2         | 5'-CCUACAAAGGAGCACAAAU-3'       | This study             |
| NPM1             | 5'-GAAUUGCUUCCGGAUGACU-3'       | Reference <sup>3</sup> |
| PES1             | 5'-CCAGAGGACCUAAGUGUGA-3'       | Reference <sup>4</sup> |

**Supplementary Table 2. List of oligonucleotides used for CRISPR/Cas9 genome tagging editing in this study.**

| Oligo                | sequence                      | Source     | Application |
|----------------------|-------------------------------|------------|-------------|
| NOL9 sgRNA           | GCCCTGAGGACCC<br>AGCATGG      | This study | Tagging     |
| WDR18 sgRNA          | GTGGGGAAGGCA<br>AGATGG        | This study | Tagging     |
| PHC2 sgRNA           | AGCATGCTCAAGG<br>ACTCCTA      | This study | Tagging     |
| NOL9-Forward primer  | GGCCCTGAGGACC<br>CAGCAT       | This study | genotyping  |
| NOL9-Reverse primer  | GGATTCGAGT<br>TCGGGTTCGG      | This study | genotyping  |
| WDR18-Forward primer | TCGTCCGCGTCTC<br>GCTCAT       | This study | genotyping  |
| WDR18-Reverse primer | ACTAAGGGTG<br>CACGCGGCC       | This study | genotyping  |
| PHC2-Forward primer  | AAG CCC TGC TGC<br>TGC TCA AG | This study | genotyping  |
| PHC2-Reverse primer  | TCCAACC<br>GGCCCCATTT CTG     | This study | genotyping  |

**Supplementary Table 3. List of antibodies used in this study.**

| Antibodies              | Source                    | Cat#         | Application         |
|-------------------------|---------------------------|--------------|---------------------|
| Anti-RING1B             | Cell Signaling Technology | 5694S        | ChIP, 1:200         |
| Anti-CBX2               | Proteintech               | 15579-1-AP   | IB, 1:500           |
| Anti-RING1B             | Genetex                   | GTX106431    | IB, 1:300           |
| Anti-RING1B             | Active Motif              | 39664        | IP, 1:50            |
| Anti-PHC2               | Elabscience               | E-AB-65051   | IB, 1:500           |
| Anti-SENP3              | Cell Signaling Technology | 5591S        | IB, 1:1000          |
| Anti-WDR18              | Sigma                     | HPA050193    | IB, 1:200; IF, 1:30 |
| Anti-MDN1               | Sigma                     | HPA029666    | IB, 1:300; IF, 1:50 |
| Anti-MDN1               | Bethyl                    | A304-739A-T  | ChIP, 1: 500        |
| Anti-NOL9               | Sigma                     | SAB4301156   | IB, 1:200;          |
| Anti-Actin              | Abcam                     | mAbcam8224   | IB, 1:500           |
| Anti-H3K9me3            | Diagenode                 | C15500003-50 | ChIP, 1:1000        |
| Anti-XRN2               | Proteintech               | 11267-1-AP   | IB, 1:500           |
| Anti-Flag               | Sigma                     | F3165        | IP, 1:100           |
| Anti-Flag M2-Peroxidase | Sigma                     | A8592        | IB, 1:10000         |
| Anti-EED                | Millipore                 | 17-10034     | IB, 1:200           |
| Anti-EZH2               | Millipore                 | 17-662       | IB, 1:300, IF, 1:50 |

|                 |                           |              |                        |
|-----------------|---------------------------|--------------|------------------------|
| Anti-TEX10      | ThermoFisher              | 720257       | IB, 1:500; ChIP, 1:500 |
| Anti-LAS1L      | Proteintech               | 16010-1-AP   | IB, 1:500              |
| Anti-GAPDH      | Abcam                     | Ab181603     | IB, 1:1000             |
| Anti-SUZ12      | Millipore                 | 17-661       | IB, 1:500              |
| Anti-H3K27me3   | Millipore                 | 17-622       | ChIP, 1:1000           |
| Anti-H2AK119ub1 | Cell Signaling Technology | 8240T        | ChIP, 1:2000           |
| Anti-RYBP       | Proteintech               | 11365-1-AP   | IB, 1:100              |
| Anti-YAF2       | Genetex                   | GTX115355    | IB, 1:100              |
| Anti-PCGF6      | Proteintech               | 24103-1-AP   | IB, 1:500              |
| Anti-NPM1       | Proteintech               | 60096-1-Ig   | IB, 1:1000; IF, 1:500  |
| Anti-BMI1       | Proteintech               | 10832-1-AP   | IB, 1:1000             |
| Anti-PELP1      | Novus bio                 | NB-110-40622 | IB, 1:500              |

**Supplementary Table 4. List of oligonucleotide sequences for RT-qPCR, and ChIP-qPCR used in this study.**

| <b>Primers</b>     | <b>Sequence</b>         | <b>Application</b> |
|--------------------|-------------------------|--------------------|
| HUMAN GAPDH-F      | AACAGCCTCAAGATCATCAGC   | ChIP               |
| HUMAN GAPDH-R      | GGATGATGTTCTGGAGAGCC    | ChIP               |
| HUMAN PCDH10-F     | GGATGGCAACCGATTTCGCTGA  | ChIP, RT           |
| HUMAN PCDH10-R     | ACCTCCTCCG TCCACCGCGG T | ChIP, RT           |
| HUMAN BETA ACTIN-R | ATGTCCACGTCACACTTCAT    | RT                 |
| HUMAN BETA ACTIN-F | AGAGCTACGAGCTGCCTGAC    | RT                 |
| HUMAN THBD-F       | ACAGTCGTCT TGTTACAGGG   | ChIP               |
| HUMAN THBD-R       | AGTAAACCCT GCCCTGGCGC   | ChIP               |
| HUMAN THBD-F       | ATGCTTGGGG TCCTGGTCCT   | RT                 |
| HUMAN THBD-R       | CACTGGCTG CCACCCGGCT    | RT                 |
| HUMAN SKOR1-F      | CCAGAAAGCAAAGTGCAAGGA   | ChIP, RT           |
| HUMAN SKOR1-R      | CCGGCTCA TATGGGCTAG AA  | ChIP, RT           |
| HUMAN PTF1A-F      | ATGGACGCGG TGTTGCTGGA   | ChIP, RT           |
| HUMAN PTF1A-R      | CGTGAAGA CTGGTCGGTG AA  | ChIP, RT           |
| HUMAN C11ORF96-F   | CAAG CTGCCAAGG GCCGG    | ChIP, RT           |
| HUMAN C11ORF96-R   | CTCCACCTCC TGGATCTCGT   | ChIP, RT           |
| HUMAN DUSP4-F      | AG AGCCTCCGCG AGGACAG   | ChIP, RT           |
| HUMAN DUSP4-R      | CTTTGAGCAG GCAGATGTCTG  | ChIP, RT           |
| HUMAN B2M-F        | AATATAAGTG GAGGCGTCGC   | RT                 |
| HUMAN B2M-R        | GAAAGAGAGA GTAGCGCGAG   | RT                 |
| HUMAN RPS14-F      | TCCCACTCTC TCTTTCCGGT   | RT                 |
| HUMAN RPS14-R      | ACAGGGTCCC CTCGCCGAG    | RT                 |
| HUMAN ENSA-F       | GACACGCAGG AGAAAGAAGG   | ChIP, RT           |
| HUMAN ENSA-R       | AGTCGGAGCC TCCAGGCTTT   | ChIP, RT           |
| HUMAN PES1-F       | AACAAGCTGG CGGAGAAGCG   | RT                 |
| HUMAN PES1-R       | TCACTCCGGC CTTGCCTTCT   | RT                 |
| HUMAN NPM1-F       | CTATTCAAG ATCTCTGGCA G  | RT                 |
| HUMAN NPM1-R       | CAACTGTTAC AGAAATGAAA   | RT                 |



|                |                       |          |
|----------------|-----------------------|----------|
| HUMAN IGFBP3-F | GGGGCTTCTG CTGGTGTGTG | ChIP, RT |
| HUMAN IGFBP3-R | CTACTTGCTC TGCATGCTGT | ChIP, RT |
| HUMAN INSM1-F  | GTGTGCGGAG AGTCGTTCGC | ChIP, RT |
| HUMAN INSM1-R  | AGGTGGCCGG GCAGTACTTG | ChIP, RT |
| Citrine-F      | CAAGGGCGA GGAGCTGTTC  | RT       |
| Citrine-R      | CACGCTGAA CTTGTGGCCG  | RT       |
| P3-F           | CGCCTTTTT CCCGAGGGTG  | ChIP     |
| P3-R           | GTGTTCTGG CGGCAAACCC  | ChIP     |
| P2-F           | ACGTATGTCGAGGTAGGCGT  | ChIP     |
| P2-R           | CTAGGCACCGGTTCAATTGC  | ChIP     |
| P1-F           | GGAATTCCAGATGGTGCCT   | ChIP     |
| P1-R           | GGCCAGAGCAGATACGTAGG  | ChIP     |
| P4-F           | TGCATAAACGTTGTCGCCATT | ChIP     |
| P4-R           | AAGTGCGCCCTTCGAGTAAG  | ChIP     |

RT, RT-pPCR.

**Supplementary Table 5 . Sources and accession numbers for Next-generation sequencing data used in this study.**

| <b>ChIP-seq</b>                       | <b>Identifier</b> | <b>Source</b>           |
|---------------------------------------|-------------------|-------------------------|
| Human embryonickidney<br>293 H3K4me4  | GSM897574         | Reference <sup>5</sup>  |
| Human embryonickidney<br>293 H3K36me3 | GSM1948534        | Reference <sup>6</sup>  |
| Human embryonickidney<br>293 H3K79me3 | GSM2357976        | Reference <sup>7</sup>  |
| Human ES H3K9me3                      | GSM1528888        | Reference <sup>8</sup>  |
| Human ES H3K27me3                     | GSM1528885        | Reference <sup>8</sup>  |
| Human ES H3K4me4                      | GSM616128         | Reference <sup>9</sup>  |
| Human ES H3K79me3                     | GSM3027439        | Reference <sup>10</sup> |
|                                       |                   |                         |
| <b>ChIP-seq of this study</b>         | <b>Identifier</b> | <b>Source</b>           |
| INPUT_siMDN1_rep1                     | GSM4239937        | This study              |
| INPUT_siMDN1_rep2                     | GSM4239938        | This study              |
| INPUT_siNC_rep1                       | GSM4239939        | This study              |
| INPUT_siNC_rep2                       | GSM4239940        | This study              |
| INPUT_siNOL9_rep1                     | GSM4239941        | This study              |
| INPUT_siNOL9_rep2                     | GSM4239942        | This study              |
| H3K9me3_rep1                          | GSM4239943        | This study              |
| H3K9me3_rep2                          | GSM4239944        | This study              |
| H3K27me3_siNC_rep1                    | GSM4239945        | This study              |
| H3K27me3_siNC_rep2                    | GSM4239946        | This study              |
| H3K27me3_siNOL9_rep1                  | GSM4239947        | This study              |
| H3K27me3_siNOL9_rep2                  | GSM4239948        | This study              |
| MDN1_siMDN1_rep1                      | GSM4239949        | This study              |
| MDN1_siMDN1_rep2                      | GSM4239950        | This study              |
| MDN1_siNC_rep1                        | GSM4239951        | This study              |
| MDN1_siNC_rep2                        | GSM4239952        | This study              |

|                                 |            |            |
|---------------------------------|------------|------------|
| H2AK119ub1-HEK293FT_rep1        | GSM4502558 | This study |
| H2AK119ub1-HEK293FT_rep2        | GSM4502559 | This study |
| H2AK119ub1-HEK293FT_siNOL9_rep1 | GSM5343681 | This study |
| H2AK119ub1-HEK293FT_siNOL9_rep2 | GSM5343682 | This study |
| MDN1-HEK293FT_RING1DKO_rep1     | GSM5343683 | This study |
| MDN1-HEK293FT_RING1DKO_rep2     | GSM5343684 | This study |
| TEX10-HEK293FT_siNC_rep1        | GSM5343685 | This study |
| TEX10-HEK293FT_siNC_rep2        | GSM5343686 | This study |
| TEX10-HEK293FT_siTEX10_rep1     | GSM5343687 | This study |
| TEX10-HEK293FT_siTEX10_rep2     | GSM5343688 | This study |
| TEX10-HEK293FT_RING1DKO_rep1    | GSM5343689 | This study |
| TEX10-HEK293FT_RING1DKO_rep2    | GSM5343690 | This study |
| H2AK119ub1-HeLa_rep1            | GSM5343691 | This study |
| H2AK119ub1-HeLa_rep2            | GSM5343692 | This study |
| H3K27me3-HeLa_rep1              | GSM5343693 | This study |
| H3K27me3-HeLa_rep2              | GSM5343694 | This study |
| INPUT-HeLa_rep1                 | GSM5343695 | This study |
| INPUT-HeLa_rep2                 | GSM5343696 | This study |
| MDN1-HeLa_siMDN1_rep1           | GSM5343697 | This study |
| MDN1-HeLa_siMDN1_rep2           | GSM5343698 | This study |
| MDN1-HeLa_siNC_rep1             | GSM5343699 | This study |
| MDN1-HeLa_siNC_rep2             | GSM5343700 | This study |
| H2AK119ub1-ES_rep1              | GSM5343673 | This study |
| H2AK119ub1-ES_rep2              | GSM5343674 | This study |
| INPUT-ES_rep1                   | GSM5343675 | This study |
| INPUT-ES_rep2                   | GSM5343676 | This study |

|                                           |                   |               |
|-------------------------------------------|-------------------|---------------|
| TEX10-ES_rep1                             | GSM5343677        | This study    |
| TEX10-ES_rep2                             | GSM5343678        | This study    |
| TEX10-ES_siTEX10_rep1                     | GSM5343679        | This study    |
| TEX10-ES_siTEX10_rep2                     | GSM5343680        | This study    |
| H2AK119ub1_HEK293FT_RING1BQ137AQ138A_rep1 | GSM5659334        | This study    |
| H2AK119ub1_HEK293FT_RING1BQ137AQ138A_rep2 | GSM5659335        | This study    |
| H2AK119ub1_HEK293FT_WT_rep1               | GSM5659336        | This study    |
| H2AK119ub1_HEK293FT_WT_rep2               | GSM5659337        | This study    |
| RING1B_HEK293FT_WT_rep1                   | GSM5659338        | This study    |
| RING1B_HEK293FT_WT_rep2                   | GSM5659339        | This study    |
| RING1B_HEK293FT_RING1BQ137AQ138A_rep1     | GSM5659340        | This study    |
| RING1B_HEK293FT_RING1BQ137AQ138A_rep2     | GSM5659341        | This study    |
|                                           |                   |               |
| <b>RNA-seq and PRO-seq of this study</b>  | <b>Identifier</b> | <b>Source</b> |
| RING1AB_KO_no_siRNA_RNAseq_HEK293FT_rep1  | GSM5394422        | This study    |
| RING1AB_KO_no_siRNA_RNAseq_HEK293FT_rep2  | GSM5394423        | This study    |
| RING1B_Q1371Q138A_RNAseq_HEK293FT_rep1    | GSM5394424        | This study    |
| RING1B_Q1371Q138A_RNAseq_HEK293FT_rep2    | GSM5394425        | This study    |
| WT_RNAseq_HEK293FT_rep1                   | GSM5394426        | This study    |
| WT_RNAseq_HEK293FT_rep2                   | GSM5394427        | This study    |
| EED_KO_RNAseq_HEK293FT_rep1               | GSM5343705        | This study    |
| EED_KO_RNAseq_HEK293FT_rep2               | GSM5343706        | This study    |
| EZH_KO_RNAseq_HEK293FT_rep1               | GSM5343707        | This study    |
| EZH_KO_RNAseq_HEK293FT_rep2               | GSM5343708        | This study    |

|                                     |            |            |
|-------------------------------------|------------|------------|
| RING1AB_KO_RNAseq_HEK293FT_rep1     | GSM5343709 | This study |
| RING1AB_KO_RNAseq_HEK293FT_rep2     | GSM5343710 | This study |
| siEZH2_RNAseq_HEK293FT_rep1         | GSM5343711 | This study |
| siEZH2_RNAseq_HEK293FT_rep2         | GSM5343712 | This study |
| siNC_RNAseq_HEK293FT_rep1           | GSM5343713 | This study |
| siNC_RNAseq_HEK293FT_rep2           | GSM5343714 | This study |
| siNOL9_RNAseq_HEK293FT_rep1         | GSM5659344 | This study |
| siNOL9_RNAseq_HEK293FT_rep2         | GSM5659345 | This study |
| siLAS1L_RNAseq_HEK293FT_rep1        | GSM5659342 | This study |
| siLAS1L_RNAseq_HEK293FT_rep2        | GSM5659343 | This study |
| siRING1B_RNAseq_HEK293FT_rep1       | GSM5343717 | This study |
| siRING1B_RNAseq_HEK293FT_rep2       | GSM5343718 | This study |
| RING1A_KO_siRING1B_RNAseq_HeLa_rep1 | GSM5343719 | This study |
| RING1A_KO_siRING1B_RNAseq_HeLa_rep2 | GSM5343720 | This study |
| siEZH2_RNAseq_HeLa_rep1             | GSM5343721 | This study |
| siEZH2_RNAseq_HeLa_rep2             | GSM5343722 | This study |
| siLAS1L_RNAseq_HeLa_rep1            | GSM5343723 | This study |
| siLAS1L_RNAseq_HeLa_rep2            | GSM5343724 | This study |
| siNC_RNAseq_HeLa_rep1               | GSM5343725 | This study |
| siNC_RNAseq_HeLa_rep2               | GSM5343726 | This study |
| siNOL9_RNAseq_HeLa_rep1             | GSM5343727 | This study |
| siNOL9_RNAseq_HeLa_rep2             | GSM5343728 | This study |
| siTEX10_RNAseq_HeLa_rep1            | GSM5343729 | This study |
| siTEX10_RNAseq_HeLa_rep2            | GSM5343730 | This study |
| siNC-proseq-rep-1                   | GSM4544659 | This study |
| siNC-proseq-rep-2                   | GSM4544660 | This study |

|                                        |            |            |
|----------------------------------------|------------|------------|
| siNOL9-proseq-rep-1                    | GSM4544661 | This study |
| siNOL9-proseq-rep-2                    | GSM4544662 | This study |
| EED-KO-proseq-rep-1                    | GSM4544662 | This study |
| EED-KO-proseq-rep-2                    | GSM4544663 | This study |
| siRING1AB-proseq-rep-1                 | GSM5343701 | This study |
| siRING1AB-proseq-rep-2                 | GSM5343702 | This study |
| RING1AB_DKO-proseq-rep1                | GSM5343703 | This study |
| RING1AB_DKO-proseq-rep2                | GSM5343704 | This study |
| siCtrl-for-RING1AB_KD_DKO-proseq-rep-1 | GSM5824569 | This study |
| siCtrl-for-RING1AB_KD_DKO-proseq-rep-2 | GSM5824570 | This study |

**Supplementary Table 6. The software and algorithms used for data analysis in this study.**

|                             |                                                                                                                                                             |                                    |
|-----------------------------|-------------------------------------------------------------------------------------------------------------------------------------------------------------|------------------------------------|
| DESeq2 (v1.18.1)            | <a href="https://doi.org/10.18129/B9.bioc.DESeq2">https://doi.org/10.18129/B9.bioc.DESeq2</a>                                                               | Reference <sup>11</sup>            |
| deeptools (v3.0.2)          | <a href="https://github.com/deeptools/">https://github.com/deeptools/</a>                                                                                   | Reference <sup>12</sup>            |
| Bedtools (v2.27.1)          | <a href="https://github.com/arq5x/bedtools2">https://github.com/arq5x/bedtools2</a>                                                                         | Reference <sup>13</sup>            |
| Samtools (v1.3.1)           | <a href="https://github.com/samtools/samtools">https://github.com/samtools/samtools</a>                                                                     | Reference <sup>14</sup>            |
| get_gene_annotati<br>ons.sh | <a href="https://github.com/AdelmanLab/GetGeneAnnotation_GGA">https://github.com/AdelmanLab/GetGeneAnnotation_GGA</a>                                       | DOI:<br>10.5281/zenodo.55<br>19928 |
| trim_and_filter_PE<br>.pl   | <a href="https://github.com/AdelmanLab/NIH_scripts/tree/main/trim_and_filter_PE">https://github.com/AdelmanLab/NIH_scripts/tree/main/trim_and_filter_PE</a> | 10.5281/zenodo.55<br>19915         |
| bowtie2stdBedGra<br>ph.pl   | <a href="https://github.com/AdelmanLab/NIH_scripts/tree/main/bowtie2stdbedgraph">https://github.com/AdelmanLab/NIH_scripts/tree/main/bowtie2stdbedgraph</a> | 10.5281/zenodo.55<br>19915         |

- 1 Murayama, A. *et al.* Epigenetic control of rDNA loci in response to intracellular energy status. *Cell* **133**, 627-639, doi:10.1016/j.cell.2008.03.030 (2008).
- 2 Raman, N., Weir, E. & Muller, S. The AAA ATPase MDN1 Acts as a SUMO-Targeted Regulator in Mammalian Pre-ribosome Remodeling. *Mol Cell* **64**, 607-615, doi:10.1016/j.molcel.2016.09.039 (2016).
- 3 Gadad, S. S. *et al.* HIV-1 infection induces acetylation of NPM1 that facilitates Tat localization and enhances viral transactivation. *J Mol Biol* **410**, 997-1007, doi:10.1016/j.jmb.2011.04.009 (2011).
- 4 Holzel, M. *et al.* The BRCT domain of mammalian Pes1 is crucial for nucleolar localization and rRNA processing. *Nucleic Acids Res* **35**, 789-800, doi:10.1093/nar/gkl1058 (2007).
- 5 Deplus, R. *et al.* TET2 and TET3 regulate GlcNAcylation and H3K4 methylation through OGT and SET1/COMPASS. *EMBO J* **32**, 645-655, doi:10.1038/emboj.2012.357 (2013).
- 6 Zhu, K. *et al.* SPOP-containing complex regulates SETD2 stability and H3K36me3-coupled alternative splicing. *Nucleic Acids Res* **45**, 92-105, doi:10.1093/nar/gkw814 (2017).
- 7 Kang, J. Y. *et al.* KDM2B is a histone H3K79 demethylase and induces transcriptional repression via sirtuin-1-mediated chromatin silencing. *FASEB J* **32**, 5737-5750, doi:10.1096/fj.201800242R (2018).
- 8 Vallot, C. *et al.* Erosion of X Chromosome Inactivation in Human Pluripotent Cells Initiates with XACT Coating and Depends on a Specific Heterochromatin Landscape. *Cell Stem Cell* **16**, 533-546, doi:10.1016/j.stem.2015.03.016 (2015).
- 9 Lister, R. *et al.* Human DNA methylomes at base resolution show widespread epigenomic differences. *Nature* **462**, 315-322, doi:10.1038/nature08514 (2009).
- 10 Bueno, C. *et al.* Enhanced hemato-endothelial specification during human embryonic differentiation through developmental cooperation between AF4-MLL and MLL-AF4 fusions. *Haematologica* **104**, 1189-1201, doi:10.3324/haematol.2018.202044 (2019).
- 11 Love, M. I., Huber, W. & Anders, S. Moderated estimation of fold change and dispersion for RNA-seq data with DESeq2. *Genome Biol* **15**, 550, doi:10.1186/s13059-014-0550-8 (2014).
- 12 Ramirez, F., Dundar, F., Diehl, S., Gruning, B. A. & Manke, T. deepTools: a flexible platform for exploring deep-sequencing data. *Nucleic Acids Res* **42**, W187-191, doi:10.1093/nar/gku365 (2014).

- 13 Quinlan, A. R. & Hall, I. M. BEDTools: a flexible suite of utilities for comparing genomic features. *Bioinformatics* **26**, 841-842, doi:10.1093/bioinformatics/btq033 (2010).
- 14 Li, H. *et al.* The Sequence Alignment/Map format and SAMtools. *Bioinformatics* **25**, 2078-2079, doi:10.1093/bioinformatics/btp352 (2009).



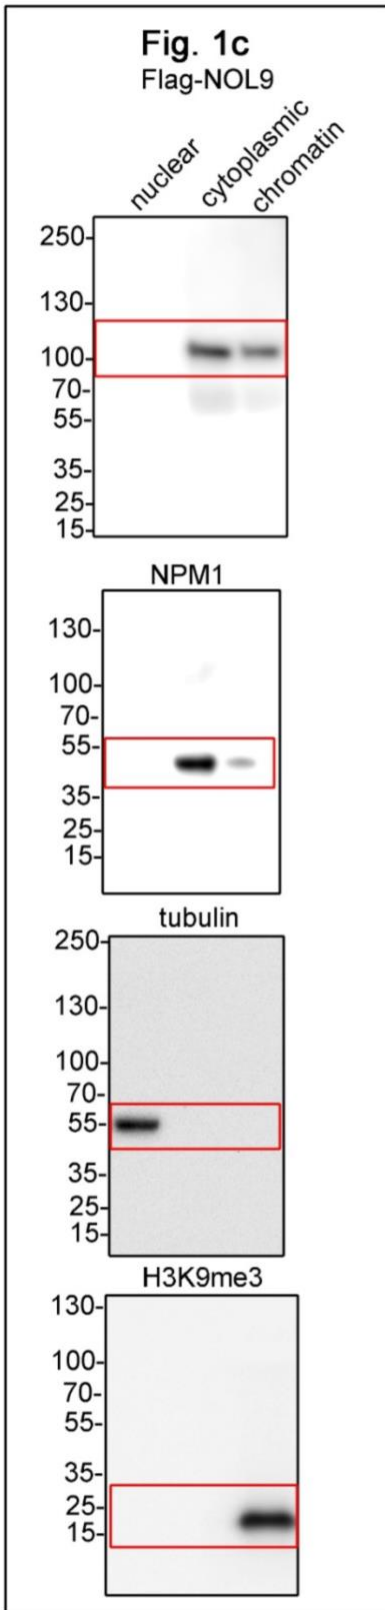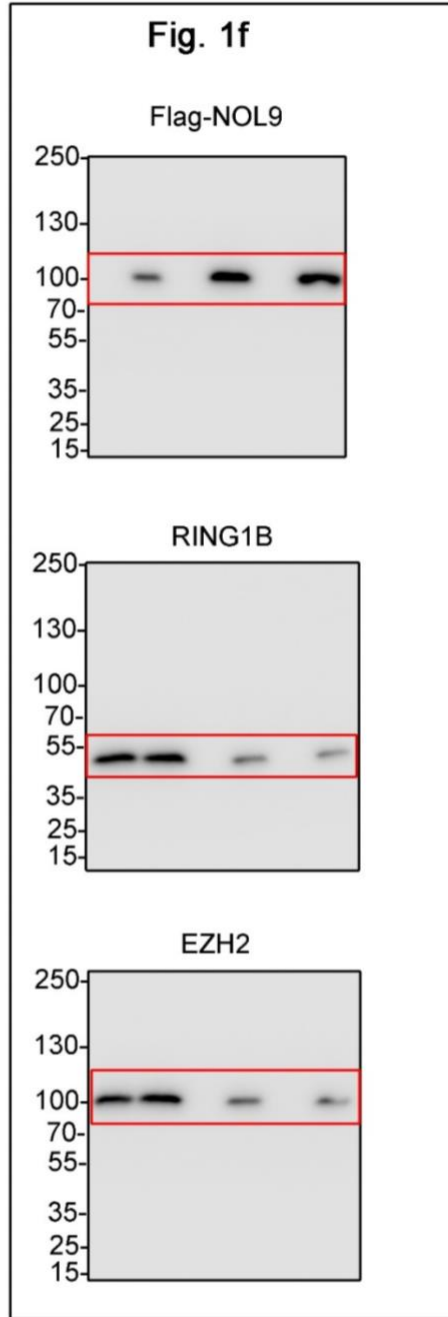

Fig. 1g

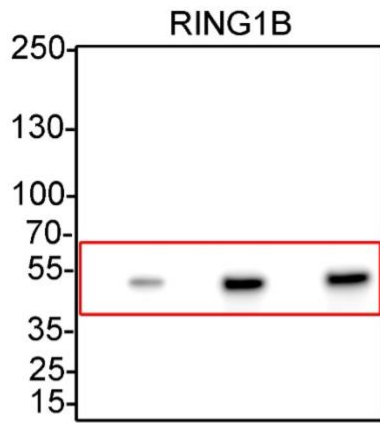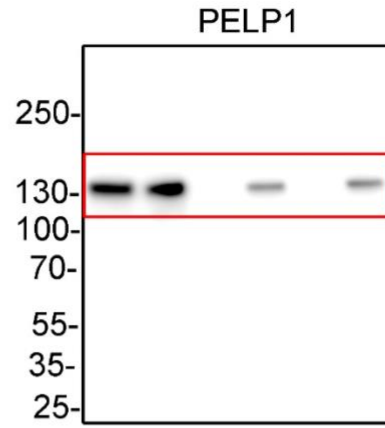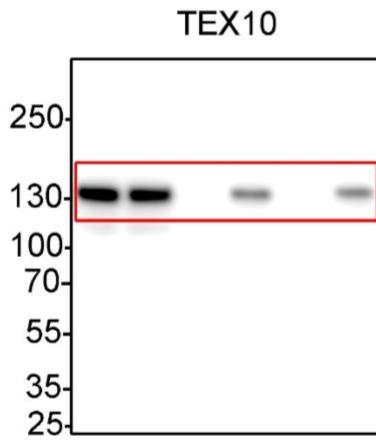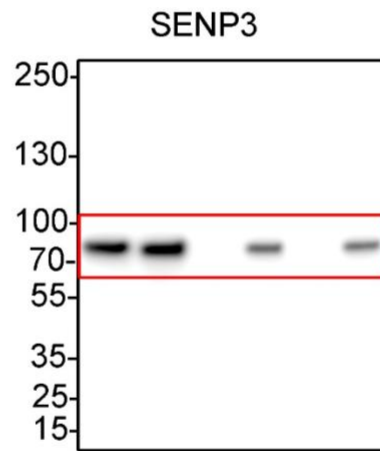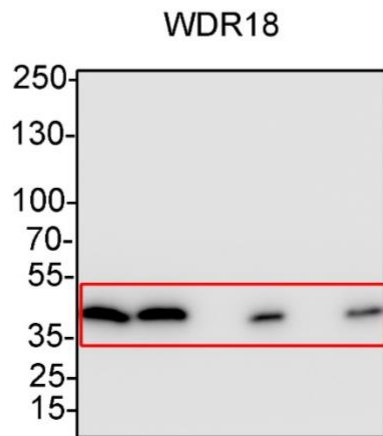

**Fig. 3b**

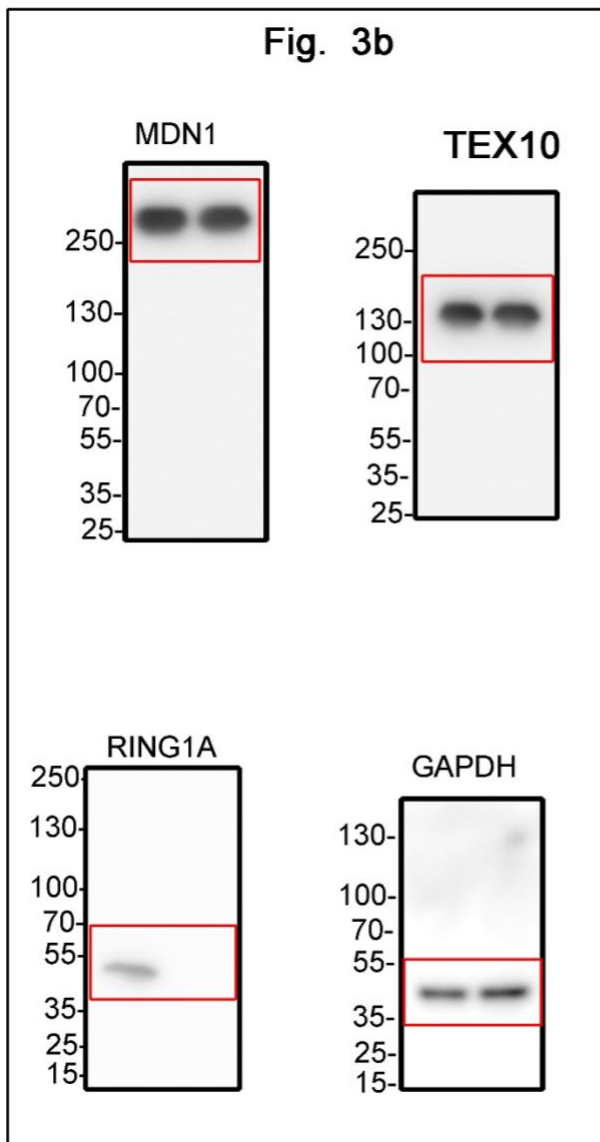

**Fig. 3g**

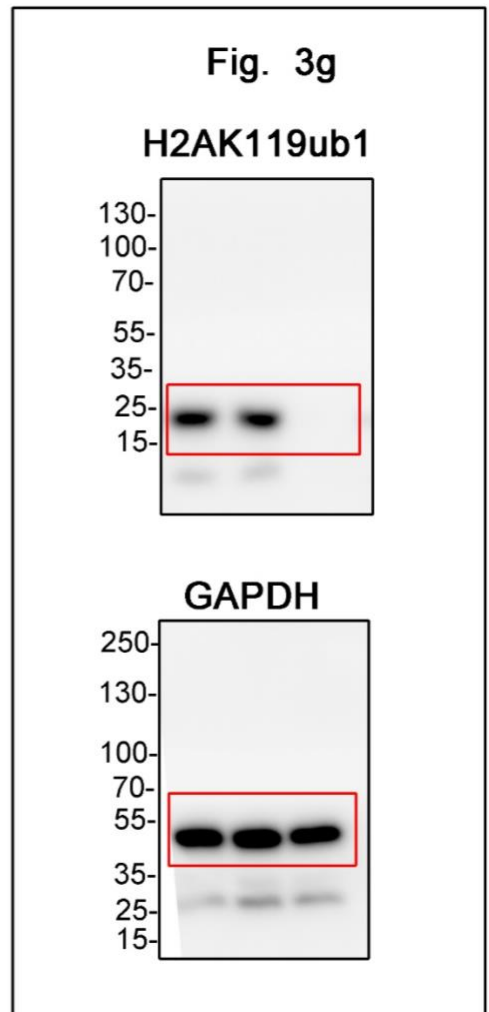

Fig. 3e

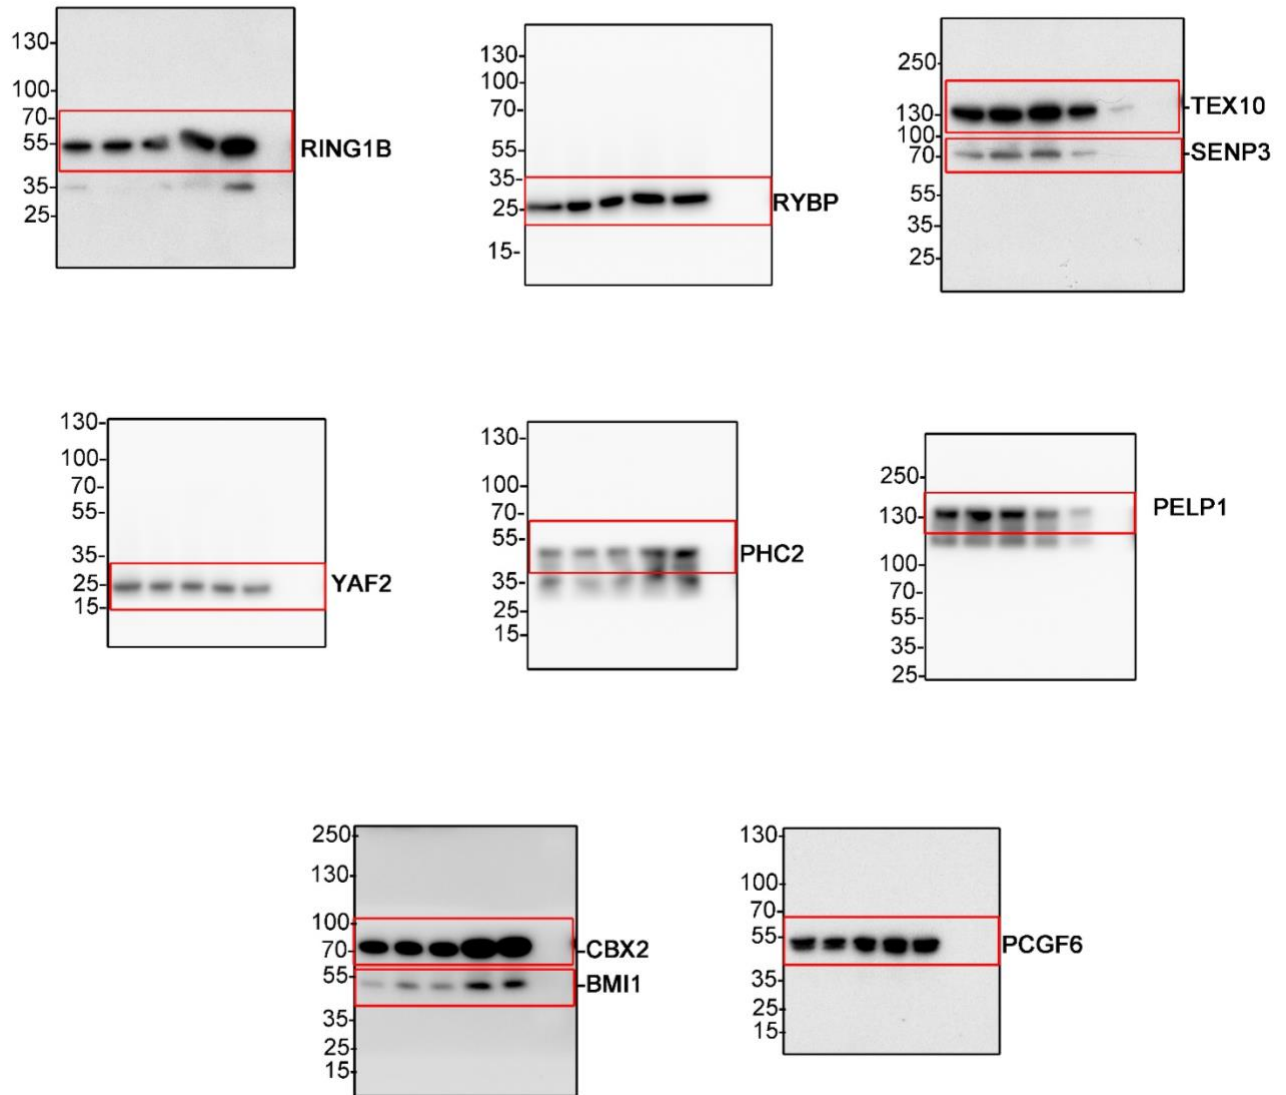

Extended data Fig. 1d

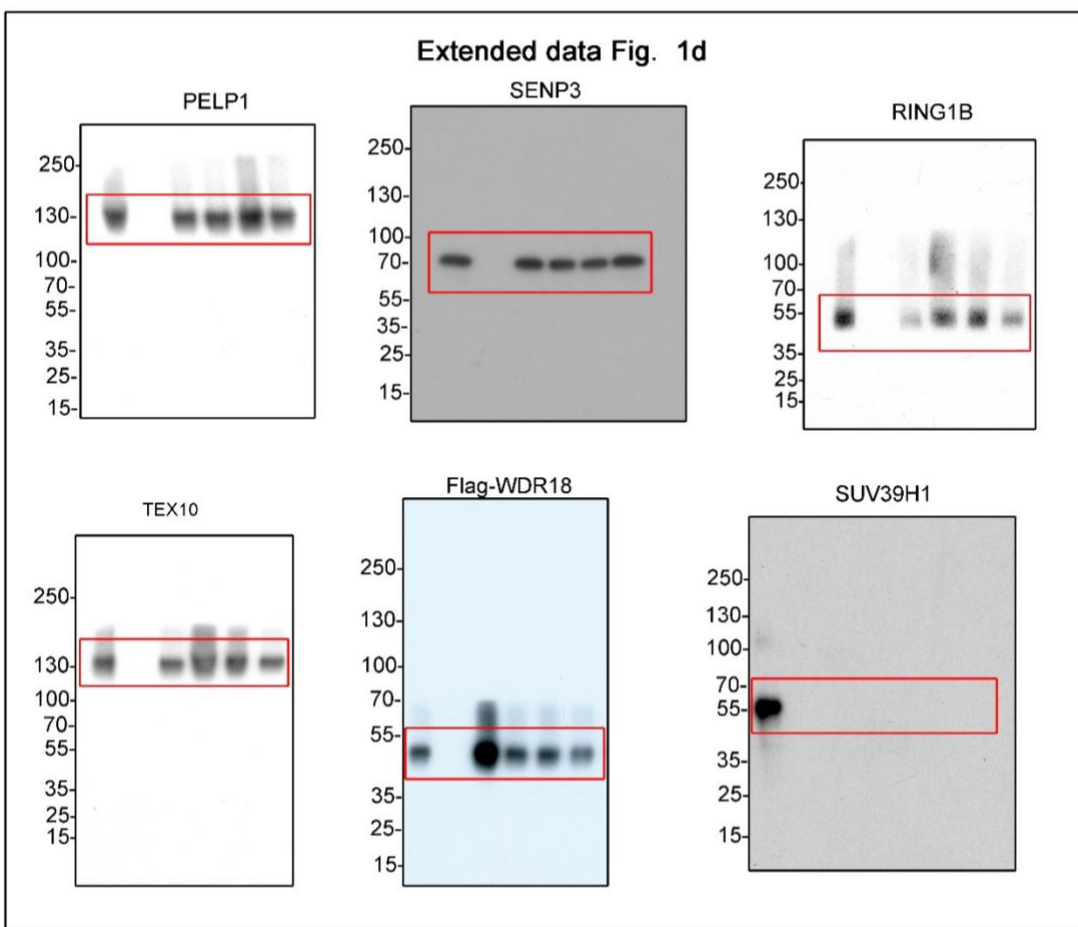

Extended data Fig. 1h

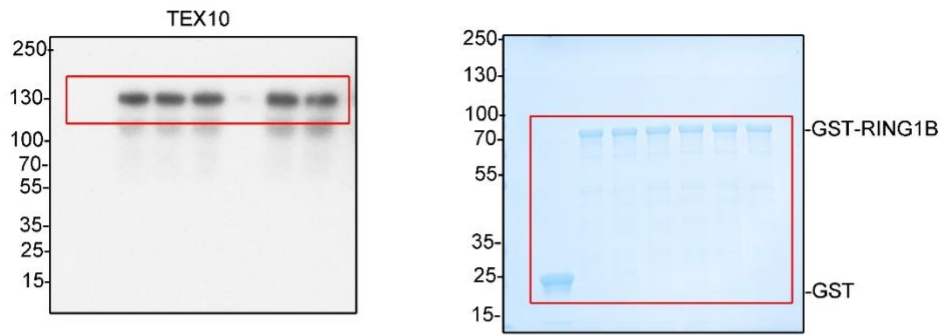

Extended data Fig. 1i

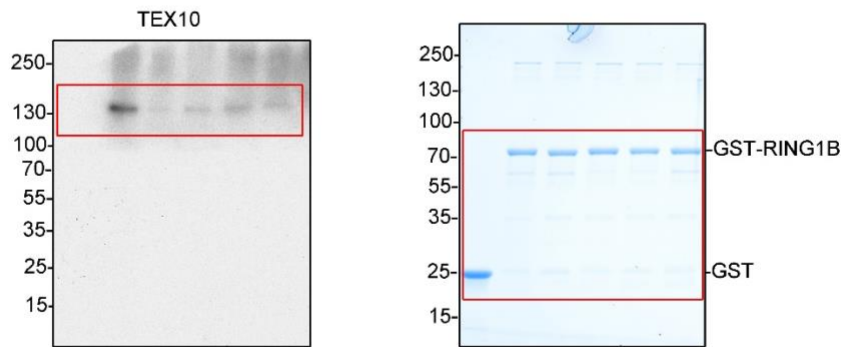

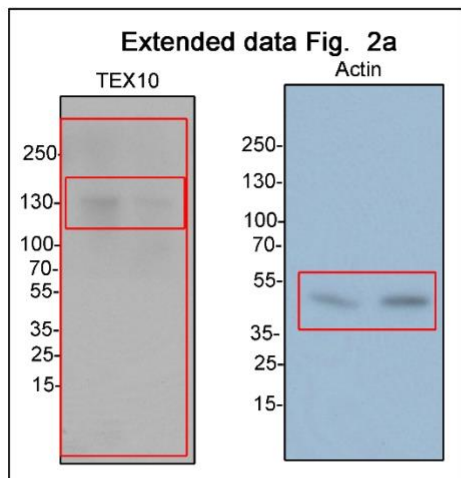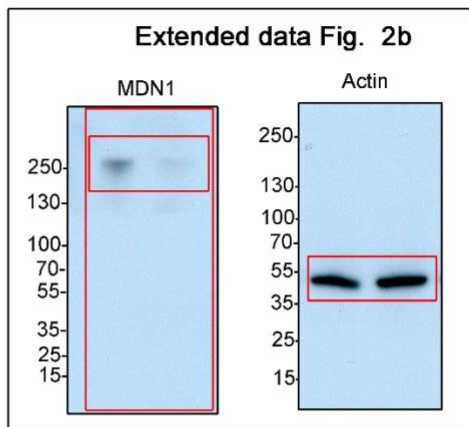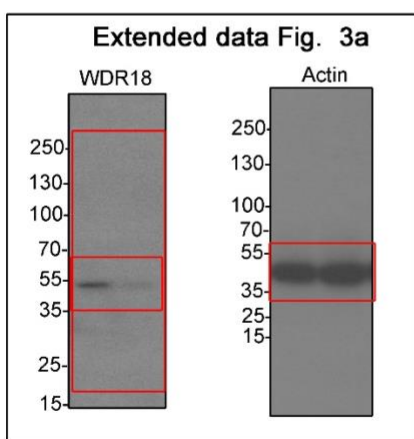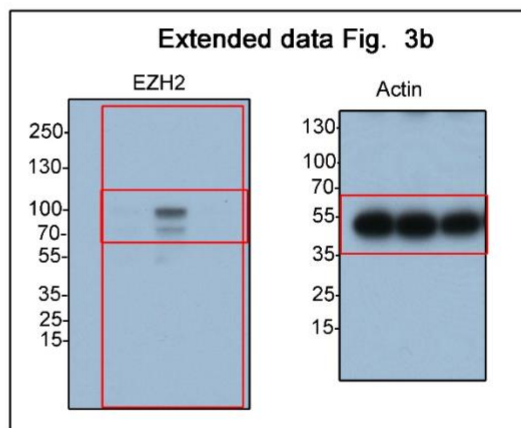

Extended data Fig. 3c

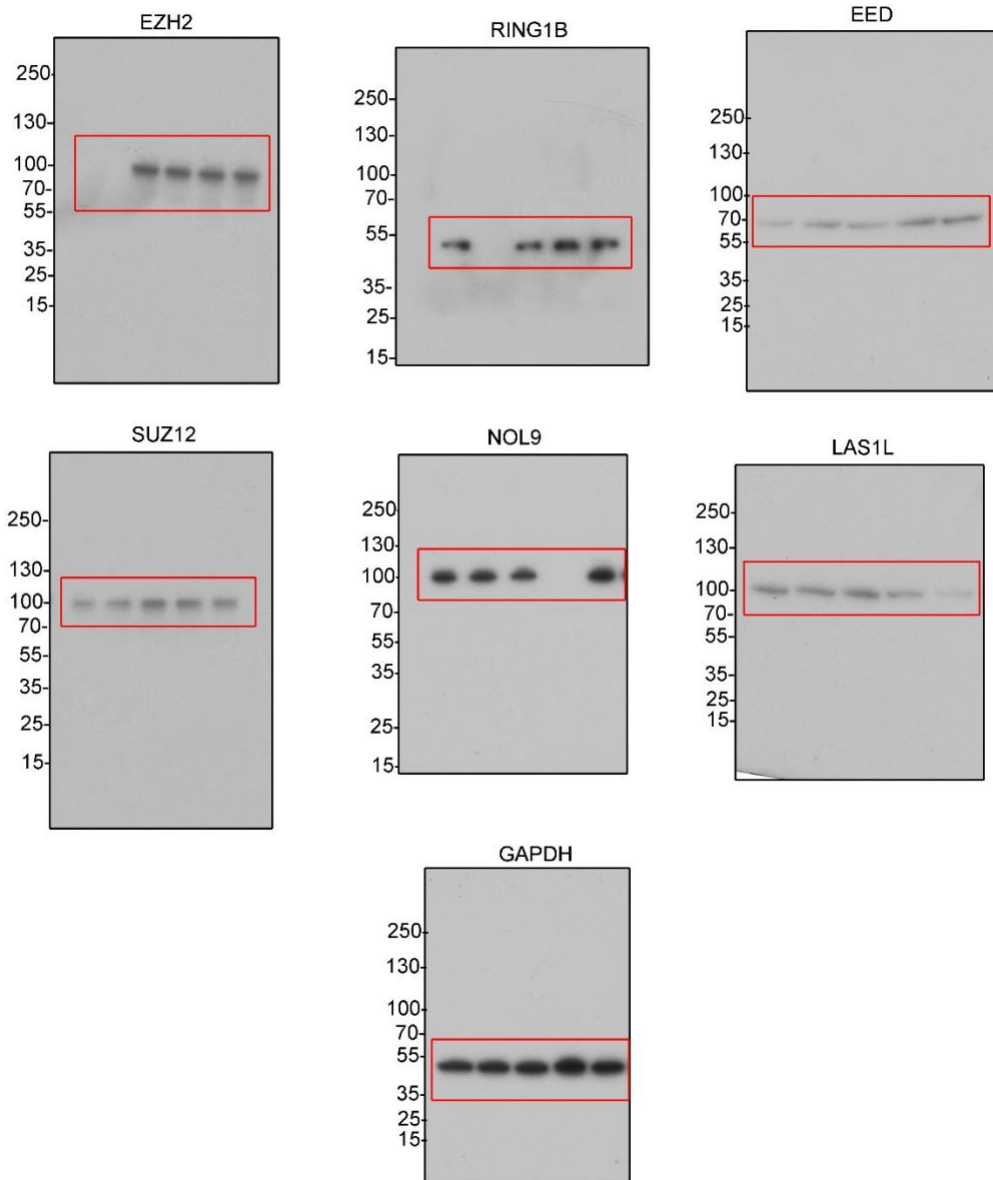



Extended data Fig. 5a RING1B-2A

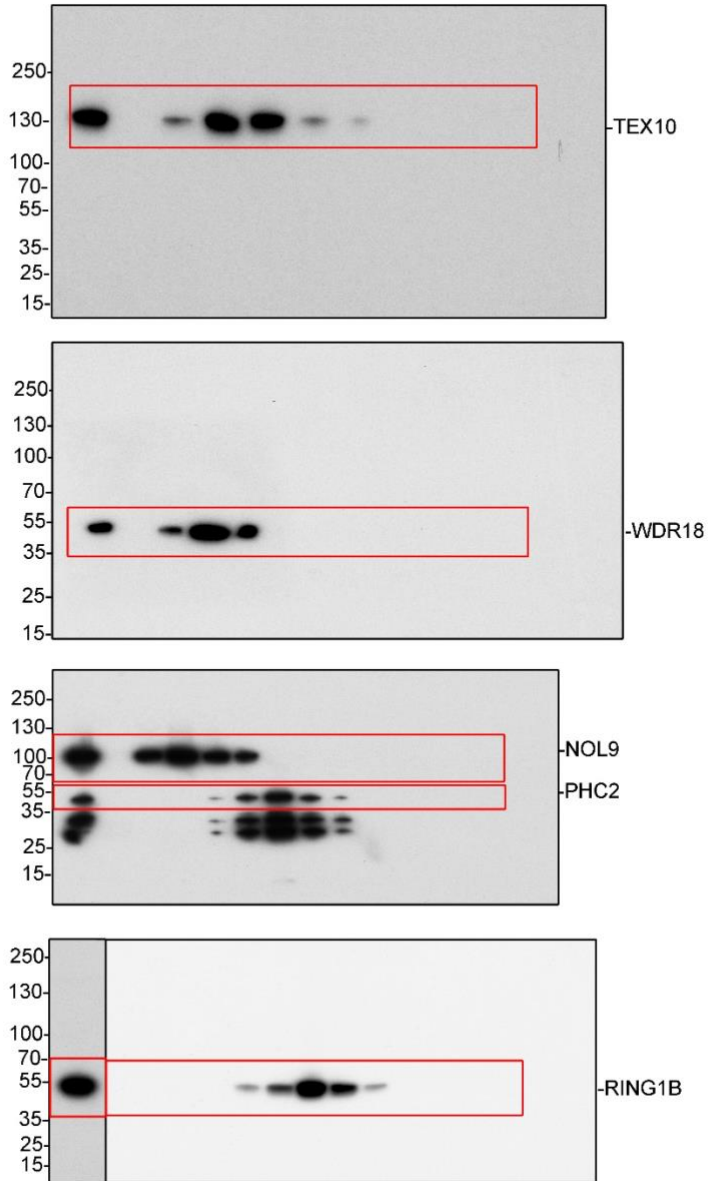

Extended data Fig. 5a WT

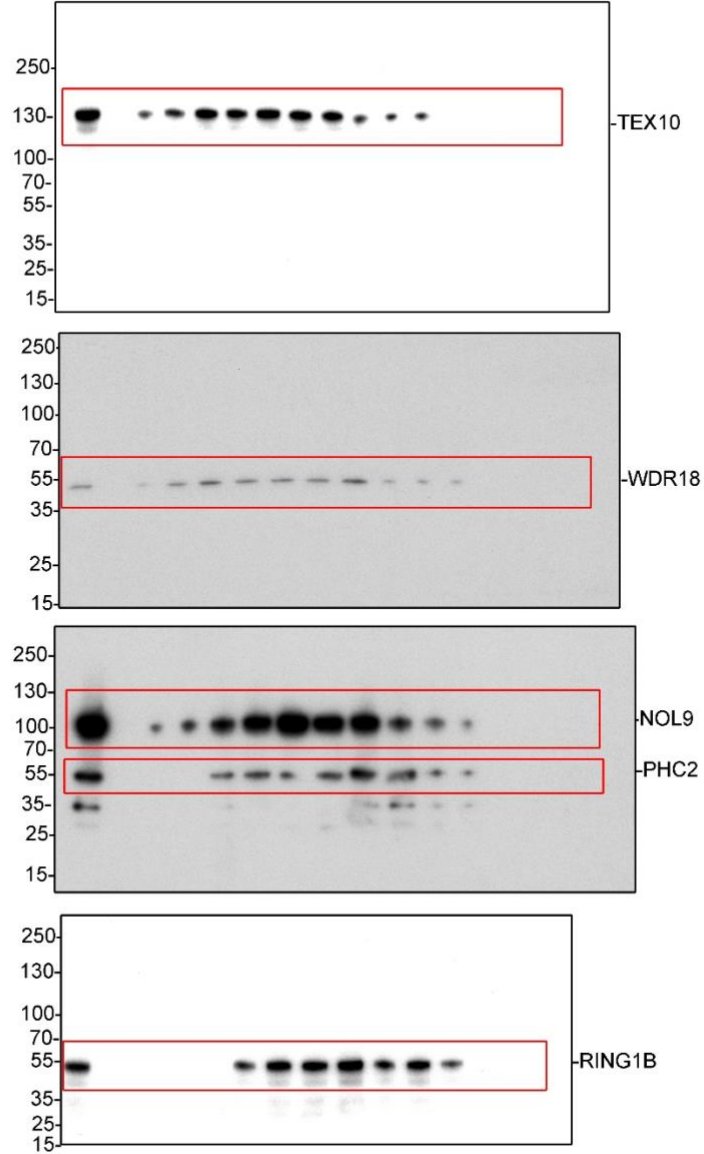

Extended data Fig. 10a

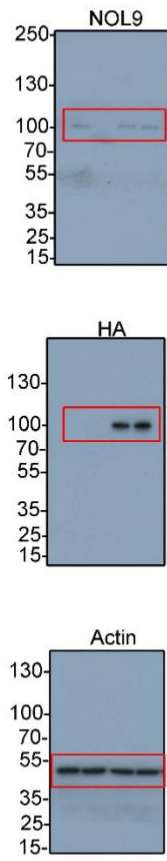

Extended data Fig. 10b

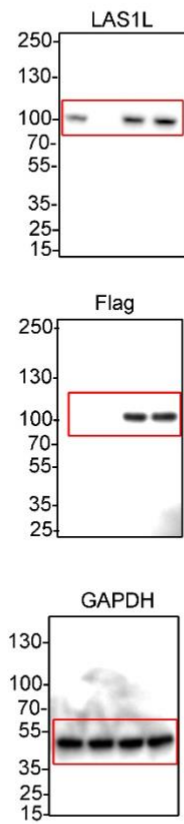

Extended data Fig. 10c

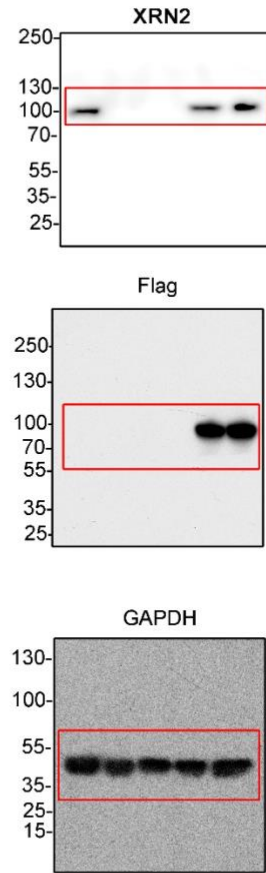

Supplement: 41586_2022_4598_MOESM1_ESM.pdf [file 41586_2022_4598_MOESM1_ESM.pdf]
