# Supplementary material for: Rixosomal RNA degradation contributes to silencing of Polycomb target genes
Source: PubMed Central journal article supplement (PMC8986528; doi:10.1038/s41586-022-04598-0), 2022-03-30
Supplement: 41586_2022_4598_MOESM2_ESM.pdf [file 41586_2022_4598_MOESM2_ESM.pdf]

## Reporting Summary

Nature Portfolio wishes to improve the reproducibility of the work that we publish. This form provides structure for consistency and transparency in reporting. For further information on Nature Portfolio policies, see our [Editorial Policies](#) and the [Editorial Policy Checklist](#).

### Statistics

For all statistical analyses, confirm that the following items are present in the figure legend, table legend, main text, or Methods section.

n/a Confirmed

- The exact sample size ( $n$ ) for each experimental group/condition, given as a discrete number and unit of measurement
- A statement on whether measurements were taken from distinct samples or whether the same sample was measured repeatedly
- The statistical test(s) used AND whether they are one- or two-sided  
*Only common tests should be described solely by name; describe more complex techniques in the Methods section.*
- A description of all covariates tested
- A description of any assumptions or corrections, such as tests of normality and adjustment for multiple comparisons
- A full description of the statistical parameters including central tendency (e.g. means) or other basic estimates (e.g. regression coefficient) AND variation (e.g. standard deviation) or associated estimates of uncertainty (e.g. confidence intervals)
- For null hypothesis testing, the test statistic (e.g.  $F$ ,  $t$ ,  $r$ ) with confidence intervals, effect sizes, degrees of freedom and  $P$  value noted  
*Give  $P$  values as exact values whenever suitable.*
- For Bayesian analysis, information on the choice of priors and Markov chain Monte Carlo settings
- For hierarchical and complex designs, identification of the appropriate level for tests and full reporting of outcomes
- Estimates of effect sizes (e.g. Cohen's  $d$ , Pearson's  $r$ ), indicating how they were calculated

*Our web collection on [statistics for biologists](#) contains articles on many of the points above.*

### Software and code

Policy information about [availability of computer code](#)

Data collection

Data analysis

For manuscripts utilizing custom algorithms or software that are central to the research but not yet described in published literature, software must be made available to editors and reviewers. We strongly encourage code deposition in a community repository (e.g. GitHub). See the Nature Portfolio [guidelines for submitting code & software](#) for further information.

### Data

Policy information about [availability of data](#)

All manuscripts must include a [data availability statement](#). This statement should provide the following information, where applicable:

- Accession codes, unique identifiers, or web links for publicly available datasets
- A description of any restrictions on data availability
- For clinical datasets or third party data, please ensure that the statement adheres to our [policy](#)

The siRNAs used in this study are listed in Extended Table S1. The primers used for ChIP-qPCR and RT-qPCR are listed in Extended Table S4. The next-generation sequencing data sets generated from this study are deposited in Gene Expression Omnibus (GEO) database using accession ID GSE175678, including ChIP-seq, RNA-seq, and PRO-seq. Published ChIP-seq datasets used in this study were downloaded from NCBI. All the datasets accession numbers are listed in Extended Table S5. The Mass spectrometry protein lists are available in Extended Tables S7 and S8.

## Field-specific reporting

Please select the one below that is the best fit for your research. If you are not sure, read the appropriate sections before making your selection.

Life sciences       Behavioural & social sciences       Ecological, evolutionary & environmental sciences

For a reference copy of the document with all sections, see [nature.com/documents/nr-reporting-summary-flat.pdf](https://www.nature.com/documents/nr-reporting-summary-flat.pdf)

## Life sciences study design

All studies must disclose on these points even when the disclosure is negative.

|                 |                                                                                                                                                                                                                                                                                                                                                                                                                                                                                                                                                            |
|-----------------|------------------------------------------------------------------------------------------------------------------------------------------------------------------------------------------------------------------------------------------------------------------------------------------------------------------------------------------------------------------------------------------------------------------------------------------------------------------------------------------------------------------------------------------------------------|
| Sample size     | Sample size was estimated according to preliminary experiments and the size of the observed effect.<br>For all high-throughput sequencing experiments, two independent biological replicates were used (RNA-seq, ChIP-seq, and PRO-seq). Two biological replicates allow us to calculate the p value and FDR values in RNAs-seq and PRO-seq analysis.<br>ChIP-qPCR and RT-qPCR were repeated with 2-4 biological replicates.<br>For counting foci in IF experiments, n>20 cells were counted for each cell staining.                                       |
| Data exclusions | No data was excluded from the analysis.                                                                                                                                                                                                                                                                                                                                                                                                                                                                                                                    |
| Replication     | Each experiment was repeated (See Figure Legends). For all high-throughput sequencing experiments, there are two biological replicates. For ChIP-qPCR and RT-qPCR, there are three biological replicates. For immunostaining, there are three biological replicates. For immunoprecipitation, there are two biological replicates.                                                                                                                                                                                                                         |
| Randomization   | Samples were allocated to groups according to genotype or treatment. No randomization was required as the starting materials.                                                                                                                                                                                                                                                                                                                                                                                                                              |
| Blinding        | The investigators were not blinded to allocation during experiments and outcome assessment. Blinding was not required because the results of physical measurements of biomolecules, phenotypic analysis (e.g., growth rates), or sequencing of nucleic acid libraries are not affected by the experimenters knowledge of sample identities. For all assays there are both negative controls and positive controls and all the results are obtained in parallel using the same settings, and each treatment was assigned to a number during the experiment. |

## Reporting for specific materials, systems and methods

We require information from authors about some types of materials, experimental systems and methods used in many studies. Here, indicate whether each material, system or method listed is relevant to your study. If you are not sure if a list item applies to your research, read the appropriate section before selecting a response.

### Materials & experimental systems

### Methods

| n/a                                 | Involved in the study                                     |
|-------------------------------------|-----------------------------------------------------------|
| <input type="checkbox"/>            | <input checked="" type="checkbox"/> Antibodies            |
| <input type="checkbox"/>            | <input checked="" type="checkbox"/> Eukaryotic cell lines |
| <input checked="" type="checkbox"/> | <input type="checkbox"/> Palaeontology and archaeology    |
| <input checked="" type="checkbox"/> | <input type="checkbox"/> Animals and other organisms      |
| <input checked="" type="checkbox"/> | <input type="checkbox"/> Human research participants      |
| <input checked="" type="checkbox"/> | <input type="checkbox"/> Clinical data                    |
| <input checked="" type="checkbox"/> | <input type="checkbox"/> Dual use research of concern     |

| n/a                                 | Involved in the study                           |
|-------------------------------------|-------------------------------------------------|
| <input type="checkbox"/>            | <input checked="" type="checkbox"/> ChIP-seq    |
| <input checked="" type="checkbox"/> | <input type="checkbox"/> Flow cytometry         |
| <input checked="" type="checkbox"/> | <input type="checkbox"/> MRI-based neuroimaging |

## Antibodies

|                 |                                                                                                                                                                                                                                                                                                                                                                                                                                                                                                                                                                                                                                                                                                                                                                                                                                                                                                                                                                                                                                                                                                                                                                                                                                                                                                                                                              |
|-----------------|--------------------------------------------------------------------------------------------------------------------------------------------------------------------------------------------------------------------------------------------------------------------------------------------------------------------------------------------------------------------------------------------------------------------------------------------------------------------------------------------------------------------------------------------------------------------------------------------------------------------------------------------------------------------------------------------------------------------------------------------------------------------------------------------------------------------------------------------------------------------------------------------------------------------------------------------------------------------------------------------------------------------------------------------------------------------------------------------------------------------------------------------------------------------------------------------------------------------------------------------------------------------------------------------------------------------------------------------------------------|
| Antibodies used | All antibodies used have been provided in Extended Data Table 3 with details                                                                                                                                                                                                                                                                                                                                                                                                                                                                                                                                                                                                                                                                                                                                                                                                                                                                                                                                                                                                                                                                                                                                                                                                                                                                                 |
| Validation      | <p>"1. Flag. The manufacturer indicates reactivity by immunoblot to detect Flag epitope-tagged proteins. This antibody has been intensely used and proved to perform well in immunoprecipitation experiments. We validated it in western blot with siRNA knockdown in human HEK293FT cells as well as against untagged control cells. We also validated it in IP-Mass spectrometry experiments by comparing IP results in Flag-NOL9 and wild type (untagged) in human HEK293FT cells.</p> <p>2. EZH2. We validated this antibody with siRNA knockdown in western blotting and immunofluorescence in human HEK293FT cells.</p> <p>3. MDN1. We validated this antibody with siRNA knockdown in western blotting, ChIP-seq and immunofluorescence in human HEK293FT cells.</p> <p>4. GAPDH: The manufacturer indicates human and mouse reactivity by immunoblot. It is widely used in western blot as a loading control. We validated it in HEK293FT cells.</p> <p>5. TEX10. We validated this antibody with siRNA knockdown in western blotting and ChIP-seq in human HEK293FT cells and human ES cells.</p> <p>6. WDR18. We validated this antibody with siRNA knockdown in western blotting and immunofluorescence in human HEK293FT cells.</p> <p>7. NOL9. We validated this antibody with siRNA knockdown in western blotting in human HEK293FT cells.</p> |

8. H2AK119ub1. We validated this antibody with RING1A/B double knockout in western blotting in human HEK293FT cells.
9. H3K27me3. This is widely used in the field. We validated in human HEK293FT cells.
10. LAS1L. We validated this antibody with siRNA knockdown in western blotting in human HEK293FT cells.
11. PELP1. We validated this antibody with siRNA knockdown in western blotting in human HEK293FT cells.
12. SUV39H1. We validated this antibody with siRNA knockdown in western blotting in human HEK293FT cells.
13. CBX2. We validated this antibody in western blotting in human HEK293FT cells.
14. PHC2. We validated this antibody in western blotting in human HEK293FT cells.
15. Actin. We validated this antibody in western blotting in human HEK293FT cells.
16. H3K9me3. We validated this antibody in western blotting in human HEK293FT cells.
17. XRN2. We validated this antibody in western blotting in human HEK293FT cells.
18. EED. We validated this antibody in western blotting in human HEK293FT cells.
19. SUZ12. We validated this antibody in western blotting in human HEK293FT cells.
20. NPM1. We validated this antibody with siRNA knockdown in western blotting and immunofluorescence in human HEK293FT cells.
21. BMI1. We validated this antibody in western blotting in human HEK293FT cells.
22. SENP3. We validated this antibody in western blotting in human HEK293FT cells.
23. RYBP. We validated this antibody in western blotting in human HEK293FT cells.
24. YAF2. We validated this antibody in western blotting in human HEK293FT cells.
25. PCGF6. We validated this antibody in western blotting in human HEK293FT cells.

## Eukaryotic cell lines

Policy information about [cell lines](#)

|                                                                      |                                                                                                                                                                                                                                                                                                                                                                    |
|----------------------------------------------------------------------|--------------------------------------------------------------------------------------------------------------------------------------------------------------------------------------------------------------------------------------------------------------------------------------------------------------------------------------------------------------------|
| Cell line source(s)                                                  | HEK293FT, from ThermoFisher (R70007). human ES cells, from Cell biology department at Harvard Medical School. HeLa, from ATCC (CCL-2).                                                                                                                                                                                                                             |
| Authentication                                                       | For cells purchased directly from ATCC, cells are authenticated by sequencing at ATCC. For human ES cells, cell culture is conducted by stem cell facility from HMS cell biology department. During culture, cells were authenticated based on the testing and monitoring of phenotypic features (morphology, differentiation potential, growth conditions, etc.). |
| Mycoplasma contamination                                             | All cell lines tested negative for Mycoplasma contamination.                                                                                                                                                                                                                                                                                                       |
| Commonly misidentified lines<br>(See <a href="#">ICLAC</a> register) | No misidentified cell lines were used.                                                                                                                                                                                                                                                                                                                             |

## ChIP-seq

### Data deposition

- Confirm that both raw and final processed data have been deposited in a public database such as [GEO](#).
- Confirm that you have deposited or provided access to graph files (e.g. BED files) for the called peaks.

Data access links  
*May remain private before publication.*

GSE175678:  
[HTTP://www.ncbi.nlm.nih.gov/geo/query/acc.cgi?acc=GSE175678](http://www.ncbi.nlm.nih.gov/geo/query/acc.cgi?acc=GSE175678)

Files in database submission

```
"INPUT_siMDN1_rep1.bw
INPUT_siMDN1_rep2.bw
INPUT_siNC_rep1.bw
INPUT_siNC_rep2.bw
INPUT_siNOL9_rep1.bw
INPUT_siNOL9_rep2.bw
H3K9me3_rep1.bw
H3K9me3_rep2.bw
H3K27me3_siNC_rep1.bw
H3K27me3_siNC_rep2.bw
H3K27me3_siNOL9_rep1.bw
H3K27me3_siNOL9_rep2.bw
MDN1_siMDN1_rep1.bw
MDN1_siMDN1_rep2.bw
MDN1_siNC_rep1.bw
MDN1_siNC_rep2.bw
H2AK119ub1-HEK293FT_rep1.bw
H2AK119ub1-HEK293FT_rep2.bw
H2AK119ub1-HEK293FT_siNOL9_rep1.bw
H2AK119ub1-HEK293FT_siNOL9_rep2.bw
MDN1-HEK293FT_RING1DKO_rep1.bw
MDN1-HEK293FT_RING1DKO_rep2.bw
TEX10-HEK293FT_siNC_rep1.bw
TEX10-HEK293FT_siNC_rep2.bw
TEX10-HEK293FT_siTEX10_rep1.bw
TEX10-HEK293FT_siTEX10_rep2.bw
TEX10-HEK293FT_RING1DKO_rep1.bw"
```

TEX10-HEK293FT\_RING1DKO\_rep2.bw  
H2AK119ub1-HeLa\_rep1.bw  
H2AK119ub1-HeLa\_rep2.bw  
H3K27me3-HeLa\_rep1.bw  
H3K27me3-HeLa\_rep2.bw  
INPUT-HeLa\_rep1.bw  
INPUT-HeLa\_rep2.bw  
MDN1-HeLa\_siMDN1\_rep1.bw  
MDN1-HeLa\_siMDN1\_rep2.bw  
MDN1-HeLa\_siNC\_rep1.bw  
MDN1-HeLa\_siNC\_rep2.bw  
H2AK119ub1-ES\_rep1.bw  
H2AK119ub1-ES\_rep2.bw  
INPUT-ES\_rep1.bw  
INPUT-ES\_rep2.bw  
TEX10-ES\_rep1.bw  
TEX10-ES\_rep2.bw  
TEX10-ES\_siTEX10\_rep1.bw  
TEX10-ES\_siTEX10\_rep2.bw  
H2AK119ub1\_HEK293FT\_RING1BQ137AQ138A\_rep1.bw  
H2AK119ub1\_HEK293FT\_RING1BQ137AQ138A\_rep2.bw  
H2AK119ub1\_HEK293FT\_WT\_rep1.bw  
H2AK119ub1\_HEK293FT\_WT\_rep2.bw  
RING1B\_HEK293FT\_WT\_rep1.bw  
RING1B\_HEK293FT\_WT\_rep2.bw  
RING1B\_HEK293FT\_RING1BQ137AQ138A\_rep1.bw  
RING1B\_HEK293FT\_RING1BQ137AQ138A\_rep2.bw

INPUT\_siMDN1\_rep1.fq  
INPUT\_siMDN1\_rep2.fq  
INPUT\_siNC\_rep1.fq  
INPUT\_siNC\_rep2.fq  
INPUT\_siNOL9\_rep1.fq  
INPUT\_siNOL9\_rep2.fq  
H3K9me3\_rep1.fq  
H3K9me3\_rep2.fq  
H3K27me3\_siNC\_rep1.fq  
H3K27me3\_siNC\_rep2.fq  
H3K27me3\_siNOL9\_rep1.fq  
H3K27me3\_siNOL9\_rep2.fq  
MDN1\_siMDN1\_rep1.fq  
MDN1\_siMDN1\_rep2.fq  
MDN1\_siNC\_rep1.fq  
MDN1\_siNC\_rep2.fq  
H2AK119ub1-HEK293FT\_rep1.fq  
H2AK119ub1-HEK293FT\_rep2.fq  
H2AK119ub1-HEK293FT\_siNOL9\_rep1.fq  
H2AK119ub1-HEK293FT\_siNOL9\_rep2.fq  
MDN1-HEK293FT\_RING1DKO\_rep1.fq  
MDN1-HEK293FT\_RING1DKO\_rep2.fq  
TEX10-HEK293FT\_siNC\_rep1.fq  
TEX10-HEK293FT\_siNC\_rep2.fq  
TEX10-HEK293FT\_siTEX10\_rep1.fq  
TEX10-HEK293FT\_siTEX10\_rep2.fq  
TEX10-HEK293FT\_RING1DKO\_rep1.fq  
TEX10-HEK293FT\_RING1DKO\_rep2.fq  
H2AK119ub1-HeLa\_rep1.fq  
H2AK119ub1-HeLa\_rep2.fq  
H3K27me3-HeLa\_rep1.fq  
H3K27me3-HeLa\_rep2.fq  
INPUT-HeLa\_rep1.fq  
INPUT-HeLa\_rep2.fq  
MDN1-HeLa\_siMDN1\_rep1.fq  
MDN1-HeLa\_siMDN1\_rep2.fq  
MDN1-HeLa\_siNC\_rep1.fq  
MDN1-HeLa\_siNC\_rep2.fq  
H2AK119ub1-ES\_rep1.fq  
H2AK119ub1-ES\_rep2.fq  
INPUT-ES\_rep1.fq  
INPUT-ES\_rep2.fq  
TEX10-ES\_rep1.fq  
TEX10-ES\_rep2.fq  
TEX10-ES\_siTEX10\_rep1.fq  
TEX10-ES\_siTEX10\_rep2.fq  
H2AK119ub1\_HEK293FT\_RING1BQ137AQ138A\_rep1.fq

```
H2AK119ub1_HEK293FT_RING1BQ137AQ138A_rep2.fq
H2AK119ub1_HEK293FT_WT_rep1.fq
H2AK119ub1_HEK293FT_WT_rep2.fq
RING1B_HEK293FT_WT_rep1.fq
RING1B_HEK293FT_WT_rep2.fq
RING1B_HEK293FT_RING1BQ137AQ138A_rep1.fq
RING1B_HEK293FT_RING1BQ137AQ138A_rep2.fq
"
```

Genome browser session  
(e.g. [UCSC](https://genome.ucsc.edu))

```
https://genome.ucsc.edu/cgi-bin/hgTracks?
db=hg19&lastVirtModeType=default&lastVirtModeExtraState=&virtModeType=default&virtMode=0&nonVirtPosition=&posit
ion=chr7%3A27069735%2D27331434&hgsid=1124281605_98AtDsDojdyO66v1aVSLPv1CFn1W
```

## Methodology

### Replicates

All ChIP-seq experiments are two biological replicates.  
Key target genes were validated by ChIP-qPCR with three biological replicates.  
All the Spearson correlations between two replicates are > 0.9.

### Sequencing depth

"All the ChIP-seq reads are 50 bp single-ended.  
sample name, accession, reads, mappable reads  
H3K9me3\_rep1 GSM4239943 36,178,114 33,299,264  
H3K9me3\_rep2 GSM4239944 33,710,338 30,088,342  
H3K27me3\_siNC\_rep1 GSM4239945 22,448,370 19,986,885  
H3K27me3\_siNC\_rep2 GSM4239946 27,258,302 25,489,190  
H3K27me3\_siNOL9\_rep1 GSM4239947 25,236,224 22,201,241  
H3K27me3\_siNOL9\_rep2 GSM4239948 44,112,820 32,274,856  
MDN1\_siMDN1\_rep1 GSM4239949 28,876,349 26,794,150  
MDN1\_siMDN1\_rep2 GSM4239950 24,505,119 21,252,219  
MDN1\_siNC\_rep1 GSM4239951 47,455,840 39,841,271  
MDN1\_siNC\_rep2 GSM4239952 46,749,114 39,523,629  
H2AK119ub1-HEK293FT\_rep1 GSM4502558 42,814,400 38,796,292  
H2AK119ub1-HEK293FT\_rep2 GSM4502559 44,810,575 40,851,022  
H2AK119ub1-HEK293FT\_siNOL9\_rep1 GSM5343681 30831920 28979586  
H2AK119ub1-HEK293FT\_siNOL9\_rep2 GSM5343682 28673743 26359794  
MDN1-HEK293FT\_RING1DKO\_rep1 GSM5343683 51892351 30157140  
MDN1-HEK293FT\_RING1DKO\_rep2 GSM5343684 68970398 23819904  
TEX10-HEK293FT\_siNC\_rep1 GSM5343685 52349542 28440006  
TEX10-HEK293FT\_siNC\_rep2 GSM5343686 45222611 26067372  
TEX10-HEK293FT\_siTEX10\_rep1 GSM5343687 54472229 45170712  
TEX10-HEK293FT\_siTEX10\_rep2 GSM5343688 53020996 43660440  
TEX10-HEK293FT\_RING1DKO\_rep1 GSM5343689 43922816 38410092  
TEX10-HEK293FT\_RING1DKO\_rep2 GSM5343690 37940504 33263796  
H2AK119ub1-HeLa\_rep1 GSM5343691 22133412 20431728  
H2AK119ub1-HeLa\_rep2 GSM5343692 21543900 18632208  
H3K27me3-HeLa\_rep1 GSM5343693 23139858 17712162  
H3K27me3-HeLa\_rep2 GSM5343694 22330217 16491690  
INPUT-HeLa\_rep1 GSM5343695 29677221 23185104  
INPUT-HeLa\_rep2 GSM5343696 28716807 21996510  
MDN1-HeLa\_siMDN1\_rep1 GSM5343697 26077688 18961200  
MDN1-HeLa\_siMDN1\_rep2 GSM5343698 25770612 17774814  
MDN1-HeLa\_siNC\_rep1 GSM5343699 28612815 25861200  
MDN1-HeLa\_siNC\_rep2 GSM5343700 27897975 24603468  
H2AK119ub1-ES\_rep1 GSM5343673 38266571 31901874  
H2AK119ub1-ES\_rep2 GSM5343674 39721402 32829510  
INPUT-ES\_rep1 GSM5343675 65906239 41147184  
INPUT-ES\_rep2 GSM5343676 58572325 40123776  
TEX10-ES\_rep1 GSM5343677 41964069 35945550  
TEX10-ES\_rep2 GSM5343678 37781268 33029886  
TEX10-ES\_siTEX10\_rep1 GSM5343679 46161213 40625820  
TEX10-ES\_siTEX10\_rep2 GSM5343680 63131985 38097246  
INPUT\_siMDN1\_rep1 GSM4239937 28980392 22973640  
INPUT\_siMDN1\_rep2 GSM4239938 33121564 27500160  
INPUT\_siNC\_rep1 GSM4239939 21738787 19575000  
INPUT\_siNC\_rep2 GSM4239940 46815083 28853400  
INPUT\_siNOL9\_rep1 GSM4239941 26745670 22704720  
INPUT\_siNOL9\_rep2 GSM4239942 38271800 30207360  
H2AK119ub1\_HEK293FT\_RING1BQ137AQ138A\_rep1 GSM5659334 35987406 27997560  
H2AK119ub1\_HEK293FT\_RING1BQ137AQ138A\_rep2 GSM5659335 33736059 26545080  
H2AK119ub1\_HEK293FT\_WT\_rep1 GSM5659336 35744555 27872520  
H2AK119ub1\_HEK293FT\_WT\_rep2 GSM5659337 35313796 27292680  
RING1B\_HEK293FT\_WT\_rep1 GSM5659338 51366994 32583120  
RING1B\_HEK293FT\_WT\_rep2 GSM5659339 48056785 31293360

|                         |                                                                                                                                                                                                    |
|-------------------------|----------------------------------------------------------------------------------------------------------------------------------------------------------------------------------------------------|
|                         | <pre>RING1B_HEK293FT_RING1BQ137AQ138A_rep1 GSM5659340 50382269 34448640<br/>RING1B_HEK293FT_RING1BQ137AQ138A_rep2 GSM5659341 70536347 45870480"</pre>                                              |
| Antibodies              | <pre>"MDN1, Bethyl, A304-739A-T.<br/>TEX10, Thermofisher, 720257.<br/>H3K27me3, Millipore, 17-622.<br/>H2AK119ub1, CST, 8240T.<br/>H3K9me3, Diagenode, C15500003-50.<br/>RING1B, CST, 5694S"</pre> |
| Peak calling parameters | <pre>" macs2/2.1.1.20160309.<br/>macs2 callpeak -t sample.bam -c input.bam -f BAM -g hs --nomodel --broad -p 1e-9 --broad-cutoff 0.05"</pre>                                                       |
| Data quality            | <pre>FASTQC 0.11.5 is run to check the sequencing quality.</pre>                                                                                                                                   |
| Software                | <pre>DEseq2 (v1.18.1), deeptool (v3.0.2), Bedtool (v2.27.1), Samtool (v1.3.1)</pre>                                                                                                                |
